# Supplementary material for: Prevalence and Clinical Impact of Emotional Dysregulation in Adults with Attention-Deficit/Hyperactivity Disorder: A Retrospective Study from a Specilized Outpatient Clinic
Source: Research Square preprint supplement (doi:10.21203/rs.3.rs-7374882/v1), 2025-09-22
Supplement: Supplementary file 1 [file b1bcb4dee3cf02f3ccc2f649.docx]

Supplement

**Table S1**. Fit statistics of the exploratory latent class analysis models

| **Model** | **LL** | **AIC** | **AICc** | **BIC** | **aBIC** | **SABIC** | **LMR** | **Entropy** |
| --- | --- | --- | --- | --- | --- | --- | --- | --- |
| 1-class | -18481.4 | 37074.8 | 37084.0 | 37333.5 | 37155.6 | 36969.4 |  |  |
| 2-class | -17635.4 | 35496.7 | 35537.3 | 36018.6 | 35659.8 | 35277.3 | 1692.1 (0.000) | 0.185 |
| 3-class | -17431.6 | 35203.3 | 35303.9 | 35988.5 | 35448.6 | 34869.9 | 407.4 (0.000) | 0.193 |
| 4-class | -17242.6 | 34939.1 | 35137.8 | 35987.6 | 35266.8 | 34491.7 | 378.1 (0.000) | 0.200 |
| 5-class | -17119.1 | 34806.1 | 35155.0 | 36117.8 | 35216.0 | 34244.7 | 247.0 (0.000) | 0.174 |
| **6-class** | -17035.4 | **34752.9** | 35326.5 | 36327.9 | 35245.0 | **34077.5** | 167.2 (0.000) | 0.164 |

**Notes.** LL, log likelihood; AIC, Akaike Information Criterion; AICc, Akaike Information Criterion with correction for small sample size; BIC, Bayesian Information Criterion; aBIC, adjusted BIC; SABIC, sample-adjusted BIC, LMR, Lo-Mendell-Rubin likelihood ratio test.

**Table S2**. The latent class probability of 2-LCs, 3-LCs, 4LCs, 5-LCs and 6LCs models

| **Model** | **Class** | **Count** | **Proportion** |
| --- | --- | --- | --- |
| **2-class** | LC1 | 319 | 0.42925 |
| LC2 | 430 | 0.57075 |
| **3-class** | LC1 | 123 | 0.17011 |
| LC2 | 345 | 0.45871 |
| LC3 | 281 | 0.37118 |
| **4-class** | LC1 | 190 | 0.25112 |
| LC2 | 155 | 0.21278 |
| LC3 | 243 | 0.31924 |
| LC4 | 161 | 0.21686 |
| **5-class** | LC1 | 71 | 0.09424 |
| LC2 | 198 | 0.26432 |
| LC3 | 138 | 0.18633 |
| LC4 | 123 | 0.16923 |
| LC5 | 219 | 0.28588 |
| **6-class** | LC1 | 68 | 0.09304 |
| LC2 | 184 | 0.24066 |
| LC3 | 79 | 0.10609 |
| LC4 | 204 | 0.27224 |
| LC5 | 93 | 0.12278 |
| LC6 | 121 | 0.16518 |

**Notes**. LC, latent class

**Table S3**. The average posterior class probability of LCA

|  | **LC1** | **LC2** | **LC3** | **LC4** | **LC5** | **LC6** |
| --- | --- | --- | --- | --- | --- | --- |
| **LC1** | 0.895 | 0.035 | 0.003 | 0.024 | 0.000 | 0.043 |
| **LC2** | 0.027 | 0.903 | 0.000 | 0.062 | 0.000 | 0.009 |
| **LC3** | 0.002 | 0.000 | 0.951 | 0.013 | 0.012 | 0.021 |
| **LC4** | 0.009 | 0.049 | 0.002 | 0.873 | 0.021 | 0.045 |
| **LC5** | 0.001 | 0.000 | 0.023 | 0.057 | 0.883 | 0.036 |
| **LC6** | 0.015 | 0.014 | 0.013 | 0.053 | 0.038 | 0.867 |

**Notes**. LCA, latent class analysis; LC, latent class; LC1: HI+ED; LC2: IA/HI+ED; LC3: PR; LC4: IA+ED; LC5: IA; LC6: HI

**Table S4**. The odds of correct classification of LCA

|  | **LC1** | **LC2** | **LC3** | **LC4** | **LC5** | **LC6** |
| --- | --- | --- | --- | --- | --- | --- |
| **LC1** | 8.540 | 0.037 | 0.003 | 0.024 | 0.000 | 0.045 |
| **LC2** | 0.027 | 9.260 | 0.000 | 0.066 | 0.000 | 0.009 |
| **LC3** | 0.002 | 0.000 | 19.600 | 0.013 | 0.012 | 0.002 |
| **LC4** | 0.010 | 0.052 | 0.002 | 6.900 | 0.022 | 0.047 |
| **LC5** | 0.001 | 0.000 | 0.024 | 0.061 | 7.540 | 0.038 |
| **LC6** | 0.015 | 0.015 | 0.013 | 0.056 | 0.039 | 6.530 |

**Notes**. LCA, latent class analysis; LC, latent class; LC1: HI+ED; LC2: IA/HI+ED; LC3: PR; LC4: IA+ED; LC5: IA; LC6: HI

**Table S5**. The model class assignment proportion of LCA based on estimated posterior probabilities

|  | **Counts** | **Proportions** |
| --- | --- | --- |
| **LC1** | 69.68681 | 0.09321 |
| **LC2** | 180.25554 | 0.24069 |
| **LC3** | 79.46510 | 0.1.633 |
| **LC4** | 203.90587 | 0.27247 |
| **LC5** | 91.96427 | 0.12286 |
| **LC6** | 123.72241 | 0.16544 |

**Notes**. LCA, latent class analysis; LC, latent class; LC1: HI+ED; LC2: IA/HI+ED; LC3: PR; LC4: IA+ED; LC5: IA; LC6: HI

## ED ***and*** comorbid disorders

**Table S6**. The 14 personality styles from the PSDI among the subphenotypes

| **Personality styles**a(M+SW) | **All subjects** | **ADHD** | **ADHD+ED** | **Statistics** | **p-value**b |
| --- | --- | --- | --- | --- | --- |
| Paranoid | 49.1±12.8 | 46.5±12.5 | 50.8±12.8 | Z=4.5 | < .001 |
| Schizoid | 52.9±11.5 | 52.7±10.8 | 53.0±12.0 | Z=1.0 | .328 |
| Schizotypal | 43.7±10.5 | 42.1±10.0 | 44.7±10.6 | Z=3.1 | .003 |
| Borderline | 54.7±9.5 | 51.0±9.0 | 57.0±9.1 | Z=8.3 | < .001 |
| Histrionic | 51.1±11.1 | 49.7±10.5 | 52.0±11.4 | Z=2.8 | .006 |
| Narcissistic | 51.6±12.3 | 49.8±10.7 | 52.7±13.1 | Z=4.4 | < .001 |
| Avoidant | 55.4±10.6 | 53.0±10.8 | 57.0±10.2 | Z=5.1 | < .001 |
| Dependent | 52.4±10.2 | 50.8±9.9 | 53.5±10.2 | Z=3.5 | .001 |
| Obsessive-compulsive | 46.9±10.3 | 48.5±9.8 | 45.8±10.5 | Z=3.3 | .001 |
| Negativistic | 54.0±10.9 | 50.1±10.2 | 56.4±10.6 | Z=7.2 | < .001 |
| Depressive | 57.2±9.7 | 54.7±9.1 | 58.8±9.7 | Z=6.0 | < .001 |
| Altruistic | 52.9±10.4 | 52.0±9.8 | 53.5±10.7 | Z=2.1 | .043 |
| Rhapsodic | 49.5±10.8 | 49.1±10.7 | 49.7±10.9 | Z=0.8 | .436 |
| Antisocial | 49.8±11.8 | 47.9±10.3 | 51.0±12.5 | Z=3.4 | < .001 |

**Notes**. ADHD, Attention-Deficit/Hyperactivity Disorder; ED, Emotional dysregulation; M, Mean; SD, Standard deviation; PSDI, Personality Style and Disorders Inventory; Number of included cases per subscale: Paranoid N=667 ;Schizoid N=670; Schizotypal N=673; Borderline N=671; Histrionic N=670; Narcissistic N=672; Avoidant N=671; Dependent N=673; Obsessive-compulsive N=668; Negativistic N=670; Depressive N=670; Altruistic N=670; Rhapsodic N=672; Antisocial N=671.

a T-values are reported.

b Adjusted p-values, based on the Benjamini-Hochberg procedure for controlling the FDR

**Table S7**. Post-hoc analysis of subscales from the FLRSa across the entire sample and the subphenotypes

|  | **All subjects** | **ADHD** | **ADHD+ED** | **Statistics** | **p-value**b |
| --- | --- | --- | --- | --- | --- |
| Task Organization | 14.2±3.6 | 13.3±3.6 | 14.7±3.5 | Z=5.1 | < .001 |
| Task Initiation | 14.0±4.4 | 13.3±4.4 | 14.5±4.3 | Z=3.9 | < .001 |
| Task Completion | 12.8±4.0 | 11.5±4.0 | 13.7±3.8 | Z=7.0 | < .001 |
| Time Management | 12.0±4.1 | 10.6±3.8 | 12.8±4.1 | Z=7.0 | < .001 |
| Planing Skills/Goal Planning | 11.5±4.2 | 10.3±4.0 | 12.2±4.2 | Z=5.6 | < .001 |
| Extracting Information | 12.1±3.8 | 11.1±3.8 | 12.8±3.6 | Z=5.6 | < .001 |
| Working Memory | 13.5±4.2 | 12.8±4.2 | 14.0±4.0 | Z=3.7 | < .001 |
| Social Functioning | 10.1±3.6 | 9.2±3.3 | 10.6±3.6 | Z=5.3 | < .001 |

**Notes**. ADHD, Attention-Deficit/Hyperactivity Disorder; ED, Emotional dysregulatio; M, Mean; SD, Standard deviation; FLRS, Functional Level Rating Scale; Number of included cases per subscale: Task Organization N=675 ; Task Initiation N=674; Task Completion N=675; Time Management N=676; Planing Skills/Goal Planning N=676; Extracting Information N=676; Working Memory N=676; Social Functioning N=671.

a Subscales of the FLRS were translated from German for reporting purposes. Each subscale comprises two items assessing the individual’s functioning in everyday task performance.

b Adjusted p-values, based on the Benjamini-Hochberg procedure for controlling the FDR
